# Supplementary material
Source: PubMed Central journal article supplement (PMC7250141)

## Supplementary Information

### Genome editing using FACS enrichment of nuclease expressing cells and indel detection by amplicon analysis

Lindsey A. Lonowski<sup>1</sup>, Yoshiki Narimatsu<sup>2</sup>, Anjum Riaz<sup>1</sup>, Catherine E. Delay<sup>1</sup>, Zhang Yang<sup>2</sup>, Francesco Niola<sup>1</sup>, Katarzyna Duda<sup>1</sup>, Elke A. Ober<sup>3</sup>, Henrik Clausen<sup>2</sup>, Hans H. Wandall<sup>2</sup>, Steen H. Hansen<sup>4</sup>, Eric P. Bennett<sup>2</sup> and Morten Frödin<sup>1</sup>

<sup>1</sup>Biotech Research and Innovation Centre (BRIC), Faculty of Health Sciences, University of Copenhagen, Ole Maaløes vej 5, 2200 Copenhagen N, Denmark. <sup>2</sup>Copenhagen Center for Glycomics, Departments of Cellular and Molecular Medicine and Odontology, Faculty of Health Sciences, University of Copenhagen, 24.6.44, Nørre Alle 20, 2200 Copenhagen N, Denmark. <sup>3</sup>Danish Stem Cell Center (DanStem), University of Copenhagen, 3B Blegdamsvej, 2200 Copenhagen N, Denmark. <sup>4</sup>GI Cell Biology Research Laboratory, Boston Children's Hospital and Harvard Medical School, Enders 605, 300 Longwood Ave, Boston, MA 02115, USA.

**Supplementary Table 1 | Nuclease-2A-FP expression systems**

| Cas9 + gRNA ("all-in-one") expression vectors |                         |                   |                                 |                                                         |                                               |                           |                                                                                                                                                                 |
|-----------------------------------------------|-------------------------|-------------------|---------------------------------|---------------------------------------------------------|-----------------------------------------------|---------------------------|-----------------------------------------------------------------------------------------------------------------------------------------------------------------|
| Fluorescent protein                           | Delivery mode           | Nuclease elements | Promoters:<br>†gRNA<br>*Cas9-FP | gRNA swapping possible (swapping method) OR custom gRNA | Plasmid name                                  | Source/Laboratory         | Reference/Link                                                                                                                                                  |
| GFP                                           | Lentiviral transduction | Cas9 + 4 gRNAs    | †mU6/hU6 /H1/7SK<br>*hU6C       | Yes (Golden Gate)                                       | pLV hU6C-Cas9-T2A-GFP                         | Addgene/ Charles Gersbach | 1/<br><a href="https://www.addgene.org/53190/">https://www.addgene.org/53190/</a>                                                                               |
| EGFP                                          | Transfection            | Cas9 + 1 gRNA     | †hU6<br>*CBh                    | Yes (BbsI)                                              | pSpCas9(BB)-2A-GFP (PX458)                    | Addgene/ Feng Zhang       | 2/<br><a href="https://www.addgene.org/48138/">https://www.addgene.org/48138/</a>                                                                               |
| GFP                                           | Lentiviral transduction | Cas9 + 1 gRNA     | †hU6<br>*EFS                    | Yes (BsmBI)                                             | pL-CRISPR.EFS.GFP                             | Addgene/ Benjamin Ebert   | 3/<br><a href="https://www.addgene.org/57818/">https://www.addgene.org/57818/</a>                                                                               |
| tagRFP                                        | Lentiviral transduction | Cas9 + 1 gRNA     | †hU6<br>*EFS                    | Yes (BsmBI)                                             | pL-CRISPR.EFS.tRFP                            | Addgene/ Benjamin Ebert   | 3/<br><a href="https://www.addgene.org/57819/">https://www.addgene.org/57819/</a>                                                                               |
| tagRFP                                        | Lentiviral transduction | Cas9 + 1 gRNA     | †hU6<br>*SFFV                   | Yes (BsmBI)                                             | pL-CRISPR.SFFV.tRFP                           | Addgene/ Benjamin Ebert   | 3/<br><a href="https://www.addgene.org/57826/">https://www.addgene.org/57826/</a>                                                                               |
| eGFP                                          | Lentiviral transduction | Cas9 + 1 gRNA     | †hU6<br>*SFFV                   | Yes (BsmBI)                                             | pL-CRISPR.SFFV.GFP                            | Addgene/ Benjamin Ebert   | 3/<br><a href="https://www.addgene.org/57827/">https://www.addgene.org/57827/</a>                                                                               |
| BFP                                           | Transfection            | Cas9 + 1 gRNA     | †hU6<br>*Cbh                    | Yes (BbsI)                                              | pU6-(BbsI)_CBh-Cas9-T2A-BFP                   | Addgene/ Ralf Kühn        | 4/<br><a href="https://www.addgene.org/64323/">https://www.addgene.org/64323/</a>                                                                               |
| mCherry                                       | Transfection            | Cas9 + 1 gRNA     | †hU6<br>*Cbh                    | Yes (BbsI)                                              | pU6-(BbsI)_CBh-Cas9-T2A-mCherry               | Addgene/ Ralf Kühn        | 4/<br><a href="https://www.addgene.org/64324/">https://www.addgene.org/64324/</a>                                                                               |
| mCherry                                       | Transfection            | Cas9 + 1 gRNA     | †hU6<br>*Cbh                    | Yes (BbsI)                                              | pU6-(BbsI)_CBh-Cas9-T2A-mcherry-P2A-Ad4E4orf6 | Addgene/ Ralf Kühn        | 4/<br><a href="https://www.addgene.org/64222/">https://www.addgene.org/64222/</a><br>Note: co-expresses viral protein to suppress NHEJ and thus promote knockin |
| BFP                                           | Transfection            | Cas9 + 1 gRNA     | †hU6<br>*Cbh                    | Yes (BbsI)                                              | pU6-(BbsI)_CBh-Cas9-T2A-BFP-P2A-Ad4E4orf6     | Addgene/ Ralf Kühn        | 4/<br><a href="https://www.addgene.org/64220/">https://www.addgene.org/64220/</a><br>Note: co-expresses viral protein to suppress NHEJ and thus promote knockin |
| mCherry                                       | Transfection            | Cas9 + 1 gRNA     | †hU6<br>*Cbh                    | Yes (BbsI)                                              | pU6-(BbsI)_CBh-Cas9-T2A-mcherry-P2A-Ad4E1B    | Addgene/ Ralf Kühn        | 4/<br><a href="https://www.addgene.org/64221/">https://www.addgene.org/64221/</a><br>Note: co-expresses viral protein to suppress NHEJ and thus promote knockin |
| BFP                                           | Transfection            | Cas9 + 1 gRNA     | †hU6<br>*Cbh                    | Yes (BbsI)                                              | pU6-(BbsI)_CBh-Cas9-T2A-BFP-P2A-Ad4E1B        | Addgene/ Ralf Kühn        | 4/<br><a href="https://www.addgene.org/64218/">https://www.addgene.org/64218/</a><br>Note: co-expresses viral protein to suppress NHEJ and thus promote knockin |
| mCherry                                       | Transfection            | Cas9 + 1 gRNA     | †hU6<br>*Cbh                    | Yes (BbsI)                                              | pU6-(BbsI)_CBh-Cas9-T2A-mcherry-H1-(BamHI)    | Addgene/ Ralf Kühn        | 4/<br><a href="https://www.addgene.org/64217/">https://www.addgene.org/64217/</a><br>Note: allows co-expression of a user-specified shRNA                       |
| tGFP                                          | Transfection            | Cas9 + 1 gRNA     | †hU6<br>*CMV, EF1a              | Yes (BamHI and BsmBI)                                   | pCas-Guide-EF1a-GFP                           | OriGene                   | <a href="http://www.origene.com/CRISPR-CAS9/Detail.aspx?sku=GE100018">http://www.origene.com/CRISPR-CAS9/Detail.aspx?sku=GE100018</a>                           |
| GFP                                           | Transfection            | Cas9 + 1 gRNA     | †hU6<br>*CBh                    | No                                                      | CRISPR/Cas9 Knockout Plasmid                  | Santa Cruz Biotechnolog   | <a href="http://www.scbt.com/crispr-cas9_system.html">http://www.scbt.com/crispr-cas9_system.html</a>                                                           |

|                                                  |                                         |                        |                          |                            |                                        |                          |                                                                                                                                                                                                                   |
|--------------------------------------------------|-----------------------------------------|------------------------|--------------------------|----------------------------|----------------------------------------|--------------------------|-------------------------------------------------------------------------------------------------------------------------------------------------------------------------------------------------------------------|
|                                                  |                                         |                        |                          |                            |                                        | y                        |                                                                                                                                                                                                                   |
| GFP                                              | Transfection                            | Cas9 + 1 gRNA          | †hU6 *CMV                | Custom gRNA                | CRISPR/Cas-GFP                         | Sigma-Aldrich            | <a href="http://www.sigmaaldrich.com/technical-documents/articles/biology/crispr-cas-gfp-vector.html">http://www.sigmaaldrich.com/technical-documents/articles/biology/crispr-cas-gfp-vector.html</a>             |
| OFF                                              | Transfection                            | Cas9 + 1 gRNA          | †hU6 *CMV                | No                         | GeneArt CRISPR Nuclease Vector         | Thermo Fisher Scientific | <a href="https://www.thermofisher.com/order/catalog/product/A21174">https://www.thermofisher.com/order/catalog/product/A21174</a>                                                                                 |
| ZsGreen                                          | Transfection OR Lentiviral transduction | Cas9 + 1 gRNA          | †hU6 *EFS                | Yes (BsmBI) OR custom gRNA | pCLIP-All-EFS-ZsGreen                  | transOMIC                | <a href="http://www.transomic.com/Catalog-Products/transEDIT-gRNA-plus-Cas9-Cloning-Vector-(EFS-ZsGre.aspx">http://www.transomic.com/Catalog-Products/transEDIT-gRNA-plus-Cas9-Cloning-Vector-(EFS-ZsGre.aspx</a> |
| tRFP                                             | Transfection OR Lentiviral transduction | Cas9 + 1 gRNA          | †hU6 *EFS                | Yes (BsmBI) OR custom gRNA | pCLIP-All-EFS-tRFP                     | transOMIC                | <a href="http://www.transomic.com/Catalog-Products/transEDIT-gRNA-plus-Cas9-Cloning-Vector-(EFS-tRFP).aspx">http://www.transomic.com/Catalog-Products/transEDIT-gRNA-plus-Cas9-Cloning-Vector-(EFS-tRFP).aspx</a> |
| GFP                                              | Transfection                            | Cas9 + 1 gRNA          | †hH1 *EF1                | No                         | EF1-T7-hspCas9-T2A-GFP-H1-gRNA         | System Biosciences       | <a href="https://www.systembio.com/crispr-cas9/Vectors">https://www.systembio.com/crispr-cas9/Vectors</a>                                                                                                         |
| RFP                                              | Transfection                            | Cas9 + 1 gRNA          | †hH1 *EF1                | No                         | EF1-T7-hspCas9-T2A-RFP-H1-gRNA         | System Biosciences       | <a href="https://www.systembio.com/crispr-cas9/Vectors">https://www.systembio.com/crispr-cas9/Vectors</a>                                                                                                         |
| GFP                                              | Transfection                            | Cas9 + 1 gRNA          | †hH1 *CAG (=CBh)         | No                         | CAG-T7-hspCas9-T2A-GFP-H1-gRNA         | System Biosciences       | <a href="https://www.systembio.com/crispr-cas9/Vectors">https://www.systembio.com/crispr-cas9/Vectors</a>                                                                                                         |
| RFP                                              | Transfection                            | Cas9 + 1 gRNA          | †hH1 *CAG (=CBh)         | No                         | CAG-T7-hspCas9-T2A-RFP-H1-gRNA         | System Biosciences       | <a href="https://www.systembio.com/crispr-cas9/Vectors">https://www.systembio.com/crispr-cas9/Vectors</a>                                                                                                         |
| GFP                                              | Transfection                            | Cas9 + 1 gRNA          | †hH1 *CMV                | No                         | CMV-T7-hspCas9-T2A-GFP-H1-gRNA         | System Biosciences       | <a href="https://www.systembio.com/crispr-cas9/Vectors">https://www.systembio.com/crispr-cas9/Vectors</a>                                                                                                         |
| mCherry                                          | Transfection OR Lentiviral transduction | Cas9 + 1 gRNA          | †hU6 *CMV                | Custom gRNA                | pCRISPR-CG01                           | GeneCopoeia              | <a href="http://www.genecopoeia.com/product/crispr-cas9/">http://www.genecopoeia.com/product/crispr-cas9/</a>                                                                                                     |
| RFP                                              | Transfection                            | Cas9 + 1 gRNA          | †hH1 *CMV                | No                         | CMV-T7-hspCas9-T2A-RFP-H1-gRNA         | System Biosciences       | <a href="https://www.systembio.com/crispr-cas9/Vectors">https://www.systembio.com/crispr-cas9/Vectors</a>                                                                                                         |
| EGFP                                             | Transfection                            | Cas9 nickase + 1 gRNA  | †hU6 *CBh                | Yes (BbsI)                 | pSpCas9n(BB)-2A-GFP (PX461)            | Addgene/ Feng Zhang      | 2/<br><a href="https://www.addgene.org/61592/">https://www.addgene.org/61592/</a>                                                                                                                                 |
| GFP Puromycin on one plasmid of the nickase pair | Transfection                            | Cas9 nickase + 1 gRNA  | †hU6 *CBh                | Custom gRNA                | Double Nickase Plasmid                 | Santa Cruz Biotechnology | <a href="http://www.scbt.com/crispr-cas9_system.html">http://www.scbt.com/crispr-cas9_system.html</a>                                                                                                             |
| GFP/RFP                                          | Transfection                            | Cas9 nickase + 2 gRNAs | †Dual U6 * Many possible | Custom gRNA                | pD14xx-xx NickaseNinja                 | DNA2.0                   | <a href="https://www.dna20.com/products/crispr?gclid=CLmtw-H9_MMCfUTicgoddXAAIw">https://www.dna20.com/products/crispr?gclid=CLmtw-H9_MMCfUTicgoddXAAIw</a>                                                       |
| GFP                                              | Transfection                            | Cas9 nickase + 1 gRNA  | †hH1 *EF1                | No                         | EF1-T7-hspCas9-nickase-T2A-GFP-H1-gRNA | System Biosciences       | <a href="https://www.systembio.com/crispr-cas9/Vectors">https://www.systembio.com/crispr-cas9/Vectors</a>                                                                                                         |
| RFP                                              | Transfection                            | Cas9 nickase + 1 gRNA  | †hH1 *EF1                | No                         | EF1-T7-hspCas9-nickase-T2A-RFP-H1-gRNA | System Biosciences       | <a href="https://www.systembio.com/crispr-cas9/Vectors">https://www.systembio.com/crispr-cas9/Vectors</a>                                                                                                         |
| GFP                                              | Transfection                            | Cas9 nickase + 1 gRNA  | †hH1 *CAG (=CBh)         | No                         | CAG-T7-hspCas9-nickase-T2A-GFP-H1-gRNA | System Biosciences       | <a href="https://www.systembio.com/crispr-cas9/Vectors">https://www.systembio.com/crispr-cas9/Vectors</a>                                                                                                         |
| RFP                                              | Transfection                            | Cas9 nickase + 1 gRNA  | †hH1 *CAG (=CBh)         | No                         | CAG-T7-hspCas9-nickase-T2A-RFP-H1-gRNA | System Biosciences       | <a href="https://www.systembio.com/crispr-cas9/Vectors">https://www.systembio.com/crispr-cas9/Vectors</a>                                                                                                         |
| GFP                                              | Transfection                            | Cas9 nickase + 1 gRNA  | †hH1 *CMV                | No                         | CMV-T7-hspCas9-nickase-T2A-GFP-H1-gRNA | System Biosciences       | <a href="https://www.systembio.com/crispr-cas9/Vectors">https://www.systembio.com/crispr-cas9/Vectors</a>                                                                                                         |
| RFP                                              | Transfection                            | Cas9 nickase + 1 gRNA  | †hH1 *CMV                | No                         | CMV-T7-hspCas9-nickase-T2A-RFP-        | System Biosciences       | <a href="https://www.systembio.com/crispr-cas9/Vectors">https://www.systembio.com/crispr-cas9/Vectors</a>                                                                                                         |

|                         |                                            | gRNA                                        |                    |                | H1-gRNA                                  |                                       |                                                                                                                                                                                                                   |
|-------------------------|--------------------------------------------|---------------------------------------------|--------------------|----------------|------------------------------------------|---------------------------------------|-------------------------------------------------------------------------------------------------------------------------------------------------------------------------------------------------------------------|
| Cas9 expression vectors |                                            |                                             |                    |                |                                          |                                       |                                                                                                                                                                                                                   |
| Fluorescent protein     | Delivery mode                              | Nuclease elements                           | Promoter (Cas9-FP) | Cloning method | Plasmid name                             | Source/Laboratory                     | Reference/Link                                                                                                                                                                                                    |
| EGFP                    | Lentiviral transduction                    | Cas9                                        | EFS-NS             | N/A            | lentiCas9-EGFP                           | Addgene/<br>Phil Sharp,<br>Feng Zhang | 5/<br><a href="https://www.addgene.org/63592/">https://www.addgene.org/63592/</a>                                                                                                                                 |
| EGFP                    | Transfection<br>OR Lentiviral transduction | Cas9                                        | CAG (=CBh)         | N/A            | pCas9_GFP                                | Addgene/<br>Kiran<br>Musunuru         | 6/<br><a href="https://www.addgene.org/44719/">https://www.addgene.org/44719/</a>                                                                                                                                 |
| GFP                     | Transfection                               | Cas9<br>(NB: <i>Staphylococcus aureus</i> ) | CAG (=CBh)         | N/A            | pSaCas9_GFP                              | Addgene/<br>Kiran<br>Musunuru         | <a href="https://www.addgene.org/64709/">https://www.addgene.org/64709/</a>                                                                                                                                       |
| EGFP                    | Transfection                               | Cas9                                        | CBh                | N/A            | CAS9PBKS                                 | Addgene/<br>Eric Bennett              | This paper/<br><a href="https://www.addgene.org/68371/">https://www.addgene.org/68371/</a>                                                                                                                        |
| GFP                     | Transfection                               | Cas9                                        | CMV                | N/A            | Cas9-GFP                                 | Sigma-Aldrich                         | <a href="http://www.sigmaaldrich.com/technical-documents/articles/biology/crispr-cas-gfp-vector.html">http://www.sigmaaldrich.com/technical-documents/articles/biology/crispr-cas-gfp-vector.html</a>             |
| ZsGreen                 | Transfection<br>OR Lentiviral transduction | Cas9                                        | EFS                | N/A            | pCLIP-Cas9-<br>Nuclease-EFS-<br>ZsGreen  | transOMIC                             | <a href="http://www.transomic.com/Catalog-Products/transEDIT-CRISPR-Cas9-Nuclease-Expression-Vect-(2).aspx">http://www.transomic.com/Catalog-Products/transEDIT-CRISPR-Cas9-Nuclease-Expression-Vect-(2).aspx</a> |
| ZsGreen                 | Transfection<br>OR Lentiviral transduction | Cas9                                        | hCMV               | N/A            | pCLIP-Cas9-<br>Nuclease-hCMV-<br>ZsGreen | transOMIC                             | <a href="http://www.transomic.com/Catalog-Products/transEDIT-CRISPR-Cas9-Nuclease-Expression-Vect-(6).aspx">http://www.transomic.com/Catalog-Products/transEDIT-CRISPR-Cas9-Nuclease-Expression-Vect-(6).aspx</a> |
| tRFP                    | Transfection<br>OR Lentiviral transduction | Cas9                                        | EFS                | N/A            | pCLIP-Cas9-<br>Nuclease-EFS-<br>tRFP     | transOMIC                             | <a href="http://www.transomic.com/Catalog-Products/transEDIT-CRISPR-Cas9-Nuclease-Expression-Vect-(3).aspx">http://www.transomic.com/Catalog-Products/transEDIT-CRISPR-Cas9-Nuclease-Expression-Vect-(3).aspx</a> |
| tRFP                    | Transfection<br>OR Lentiviral transduction | Cas9                                        | hCMV               | N/A            | pCLIP-Cas9-<br>Nuclease-hCMV-<br>tRFP    | transOMIC                             | <a href="http://www.transomic.com/Catalog-Products/transEDIT-CRISPR-Cas9-Nuclease-Expression-Vect-(7).aspx">http://www.transomic.com/Catalog-Products/transEDIT-CRISPR-Cas9-Nuclease-Expression-Vect-(7).aspx</a> |
| copGFP                  | Transfection<br>OR Lentiviral transduction | hspCas9                                     | CMV or<br>MSCV     | N/A            | Not available                            | System<br>Biosciences                 | <a href="https://www.systembio.com/crispr-cas9/Vectors">https://www.systembio.com/crispr-cas9/Vectors</a>                                                                                                         |
| mCherry                 | Transfection                               | Cas9                                        | CMV                | N/A            | CP-C9NU-01                               | GeneCopoeia                           | <a href="http://www.genecopoeia.com/product/crispr-cas9/">http://www.genecopoeia.com/product/crispr-cas9/</a>                                                                                                     |
| EGFP                    | Lentiviral transduction                    | Cas9                                        | CMV                | N/A            | CP-LvC9NU-02                             | GeneCopoeia                           | <a href="http://www.genecopoeia.com/product/crispr-cas9/">http://www.genecopoeia.com/product/crispr-cas9/</a>                                                                                                     |
| EGFP                    | Transfection                               | Cas9<br>nickase                             | CAG (=CBh)         | N/A            | pCas9D10A_GFP                            | Addgene/<br>Kiran<br>Musunuru         | 6/<br><a href="https://www.addgene.org/44720/">https://www.addgene.org/44720/</a>                                                                                                                                 |
| ZsGreen                 | Transfection<br>OR Lentiviral transduction | Cas9<br>nickase                             | EFS                | N/A            | pCLIP-Cas9-<br>Nickase-EFS-<br>ZsGreen   | transOMIC                             | <a href="http://www.transomic.com/Catalog-Products/transEDIT-CRISPR-Cas9-Nickase-Expression-Vecto-(2).aspx">http://www.transomic.com/Catalog-Products/transEDIT-CRISPR-Cas9-Nickase-Expression-Vecto-(2).aspx</a> |
| tRFP                    | Transfection<br>OR Lentiviral              | Cas9<br>nickase                             | EFS                | N/A            | pCLIP-Cas9-<br>Nickase-EFS-tRFP          | transOMIC                             | <a href="http://www.transomic.com/Catalog-Products/transEDIT-CRISPR-Cas9-Nickase-Expression-Vecto-(3).aspx">http://www.transomic.com/Catalog-Products/transEDIT-CRISPR-Cas9-Nickase-Expression-Vecto-(3).aspx</a> |
| copGFP                  | Transfection<br>OR Lentiviral transduction | Cas9<br>nickase                             | CMV Or<br>MSCV     | N/A            | Not available                            | System<br>Biosciences                 | <a href="https://www.systembio.com/crispr-cas9/Vectors">https://www.systembio.com/crispr-cas9/Vectors</a>                                                                                                         |
| Cas9<br>nickase         | Cas9 nickase                               | Cas9<br>nickase                             | CMV                | N/A            | CP-C9NI-02                               | GeneCopoeia                           | <a href="http://www.genecopoeia.com/product/crispr-cas9/">http://www.genecopoeia.com/product/crispr-cas9/</a>                                                                                                     |

| gRNA expression vectors containing FPs |                                         |                   |                      |                                                         |                                |                         |                                                                                                                                                                                                                                                             |
|----------------------------------------|-----------------------------------------|-------------------|----------------------|---------------------------------------------------------|--------------------------------|-------------------------|-------------------------------------------------------------------------------------------------------------------------------------------------------------------------------------------------------------------------------------------------------------|
| Fluorescent protein                    | Delivery mode                           | Nuclease elements | Promoters: †gRNA *FP | gRNA swapping possible (swapping method) OR Custom gRNA | Plasmid name                   | Source /Laboratory      | Reference/Link                                                                                                                                                                                                                                              |
| EGFP                                   | Lentiviral, in-vivo mouse targeting     | 1 gRNA            | †hU6 *hSYN1          | Yes (SapI)                                              | PX552                          | Addgene/ Feng Zhang     | 7/<br><a href="https://www.addgene.org/60958/">https://www.addgene.org/60958/</a>                                                                                                                                                                           |
| EGFP                                   | Lentiviral transduction                 | 1 gRNA            | †hU6 *EFS            | Yes (BsmBI)                                             | pLKO5.sgRNA.EFS.GFP            | Addgene/ Benjamin Ebert | 3/<br><a href="https://www.addgene.org/57822/">https://www.addgene.org/57822/</a>                                                                                                                                                                           |
| TagRFP                                 | Lentiviral transduction                 | 1 gRNA            | †hU6 *EFS            | Yes (BsmBI)                                             | pLKO5.sgRNA.EFS.tRFP           | Addgene/ Benjamin Ebert | 3/<br><a href="https://www.addgene.org/57823/">https://www.addgene.org/57823/</a>                                                                                                                                                                           |
| EGFP                                   | Transfection                            | 1 gRNA            | †hU6 *PGK1           | Yes (SacI)                                              | pU6_gRNA_handle_U6t            | Addgene/ Timothy Lu     | 8/<br><a href="https://www.addgene.org/49016/">https://www.addgene.org/49016/</a>                                                                                                                                                                           |
| TagBFP                                 | Lentiviral transduction                 | 1 gRNA            | †hU6 *PGK            | Yes (BbsI)                                              | pKLV-U6gRNA(BbsI)-PGKpuro2ABFP | Addgene/ Kosuke Yusa    | 9/<br><a href="https://www.addgene.org/50946/">https://www.addgene.org/50946/</a>                                                                                                                                                                           |
| ZsGreen                                | Transfection OR Lentiviral transduction | 1 gRNA            | †hU6 *EFS            | Yes (BsmBI)                                             | pCLIP-gRNA-EFS-ZsGreen         | transOMIC               | <a href="http://www.transomic.com/Catalog-Products/transEDIT-gRNA-Cloning-Vector-(EFS-ZsGreen).aspx">http://www.transomic.com/Catalog-Products/transEDIT-gRNA-Cloning-Vector-(EFS-ZsGreen).aspx</a>                                                         |
| tRFP                                   | Transfection OR Lentiviral transduction | 1 gRNA            | †hU6 *EFS            | Yes (BsmBI)                                             | pCLIP-gRNA-EFS-tRFP            | transOMIC               | <a href="http://www.transomic.com/Catalog-Products/transEDIT-gRNA-Cloning-Vector-(EFS-tRFP).aspx">http://www.transomic.com/Catalog-Products/transEDIT-gRNA-Cloning-Vector-(EFS-tRFP).aspx</a>                                                               |
| copGFP                                 | Transfection OR Lentiviral transduction | 1 gRNA            | †U6 Or H1 *EF1a      | No                                                      | N/A                            | System Biosciences      | <a href="https://www.systembio.com/crispr-cas9/Vectors">https://www.systembio.com/crispr-cas9/Vectors</a>                                                                                                                                                   |
| RFP                                    | Transfection OR Lentiviral transduction | 1 gRNA            | U6 Or H1 *EF1a       | No                                                      | N/A                            | System Biosciences      | <a href="https://www.systembio.com/crispr-cas9/Vectors">https://www.systembio.com/crispr-cas9/Vectors</a>                                                                                                                                                   |
| mCherry                                | Lentiviral transduction                 | 1 gRNA            | †hU6                 | Custom gRNA                                             | pCRISPR-LvSG03                 | GeneCopoeia             | <a href="http://www.genecopoeia.com/product/crispr-cas9/">http://www.genecopoeia.com/product/crispr-cas9/</a>                                                                                                                                               |
| ZFNs                                   |                                         |                   |                      |                                                         |                                |                         |                                                                                                                                                                                                                                                             |
| Fluorescent protein                    | Delivery mode                           | Nuclease elements | Promoter (FP-ZFN)    | Cloning method                                          | Plasmid name                   | Source/ Laboratory      | Reference/Link                                                                                                                                                                                                                                              |
| GFP                                    | Transfection                            | ZFN-L (FokI-ELD)  | CMV                  | Custom ZFN                                              | pZFN1-GFP                      | Sigma-Aldrich           | <a href="http://www.sigmaaldrich.com/technical-documents/articles/biology/fluorescent-protein-linked-zinc-finger-nucleases.html">http://www.sigmaaldrich.com/technical-documents/articles/biology/fluorescent-protein-linked-zinc-finger-nucleases.html</a> |
| RFP                                    | Transfection                            | ZFN-R (FokI-KKR)  | CMV                  | Custom ZFN                                              | pZFN2-RFP                      | Sigma-Aldrich           | <a href="http://www.sigmaaldrich.com/technical-documents/articles/biology/fluorescent-protein-linked-zinc-finger-nucleases.html">http://www.sigmaaldrich.com/technical-documents/articles/biology/fluorescent-protein-linked-zinc-finger-nucleases.html</a> |
| GFP                                    | Lentiviral transduction                 | ZFN-L (FokI-ELD)  | CMV                  | Custom ZFN                                              | GFP-ZFNL-IDLV                  | Sigma-Aldrich           | <a href="http://www.sigmaaldrich.com/life-science/zinc-finger-nuclease-technology/integrase-deficient-lentivirus.html">http://www.sigmaaldrich.com/life-science/zinc-finger-nuclease-technology/integrase-deficient-lentivirus.html</a>                     |
| RFP                                    | Lentiviral transduction                 | ZFN-R (FokI-KKR)  | CMV                  | Custom ZFN                                              | RFP-ZFNR-IDLV                  | Sigma-Aldrich           | <a href="http://www.sigmaaldrich.com/life-science/zinc-finger-nuclease-technology/integrase-deficient-lentivirus.html">http://www.sigmaaldrich.com/life-science/zinc-finger-nuclease-technology/integrase-deficient-lentivirus.html</a>                     |
| GFP                                    | Transfection                            | ZFN-L (FokI-      | CMV                  | Custom ZFN                                              | GFP-2A-ZFNL-2A-                | Sigma-Aldrich           | <a href="http://www.sigmaaldrich.com/technical-documents/articles/biology/fluorescent-protein-linked-zinc-finger-nucleases.html">http://www.sigmaaldrich.com/technical-documents/articles/biology/fluorescent-protein-linked-zinc-finger-nucleases.html</a> |

|                     |              | ELD) + ZFN-R (FokI-KKR) "all-in-one" |            |                | ZFNR              |                                    | <a href="http://om/technical-documents/articles/biology/fluorescent-protein-linked-zinc-finger-nucleases.html">om/technical-documents/articles/biology/fluorescent-protein-linked-zinc-finger-nucleases.html</a> |
|---------------------|--------------|--------------------------------------|------------|----------------|-------------------|------------------------------------|------------------------------------------------------------------------------------------------------------------------------------------------------------------------------------------------------------------|
| TALENs              |              |                                      |            |                |                   |                                    |                                                                                                                                                                                                                  |
| Fluorescent protein | Delivery     | Nuclease elements                    | Promoter   | Cloning method | Plasmid name      | Source/Laboratory                  | Reference/Link                                                                                                                                                                                                   |
| EGFP                | Transfection | TALEN-L                              | CMV SV40   | Golden Gate    | pcDNA3.1(-)-EGFP  | Xin Huang                          | 10                                                                                                                                                                                                               |
| DsRed               | Transfection | TALEN-R                              | CMV SV40   | Golden Gate    | pcDNA3.1(-)-DsRed | Xin Huang                          | 10                                                                                                                                                                                                               |
| EGFP                | Transfection | TALEN-L (FokI-ELD)                   | CAG (=CBh) | BsmBI          | pTAL_GFP          | Addgene/Kiran Musunuru, Chad Cowan | 11/<br><a href="http://www.addgene.org/TALEN/Musunuru/">http://www.addgene.org/TALEN/Musunuru/</a>                                                                                                               |
| RFP                 | Transfection | TALEN-R (FokI-KKR)                   | CAG (=CBh) | BsmBI          | pTAL_RFP          | Addgene/Kiran Musunuru, Chad Cowan | 11/<br><a href="http://www.addgene.org/TALEN/Musunuru/">http://www.addgene.org/TALEN/Musunuru/</a>                                                                                                               |
| Donor vectors       |              |                                      |            |                |                   |                                    |                                                                                                                                                                                                                  |
| RFP                 | Transfection | Donor for HDR only                   | EF1a (RFP) |                | HDR Plasmid       | Santa Cruz Biotechnology           | <a href="http://www.scbt.com/crispr-cas9_system.html">http://www.scbt.com/crispr-cas9_system.html</a>                                                                                                            |

BFP, blue fluorescent protein; CAG, CMV early enhancer/chicken  $\beta$ -actin; CBh, chicken  $\beta$ -actin hybrid; CMV, cytomegalovirus; MSCV, murine stem cell virus; EBFP2, enhanced blue fluorescent protein 2; EFS, elongation factor-1 short; EGFP, enhanced green fluorescent protein; RFP, red fluorescent protein; GFP, green fluorescent protein; hUbC, human ubiquitin C; N/A, not applicable; OFP, orange fluorescent protein; PGK1, phosphoglycerate kinase-1; SFFV, spleen focus-forming virus; SYN1, synapsin-1; tRFP, turbo red fluorescent protein.

Unless stated otherwise, Cas9 protein is from *Streptococcus pyogenes*. When known, the species of the U6 and H1 promoters is indicated: h=Homo sapiens, m=Mus musculus.

## Supplementary Table 2 | IDAA primers

| Primer name        | Sequence (5' to 3')                           |
|--------------------|-----------------------------------------------|
| <b>GALNT10-Fwd</b> | AGCTGACCGGCAGCAAAATTGGCTTGCTCCCCTCCTACTCT     |
| <b>GALNT10-Rev</b> | ACAACAGCCAGGGAAACATC                          |
| <b>KRAS-Fwd</b>    | AGCTGACCGGCAGCAAAATTGAAAAGGTACTGGTGGAGTATTTGA |
| <b>KRAS-Rev</b>    | TCATGAAAATGGTCAGAGAAACC                       |
| <b>B4GALT4-Fwd</b> | AGCTGACCGGCAGCAAAATTGTCGCCCTCAGGAATGTAAAG     |
| <b>B4GALT4-Rev</b> | TTTCCCAGAACTTGAACCCA                          |
| <b>B4GALT3-Fwd</b> | AGCTGACCGGCAGCAAAATTGCATAGTCTGGTTCCCCTCCA     |
| <b>B4GALT3-Rev</b> | CGAGTCTTCTGGGGACACAT                          |
| <b>GALNT3-Fwd</b>  | AGCTGACCGGCAGCAAAATTGTCCCTCCAGGTGAGTGTTTC     |
| <b>GALNT3-Rev</b>  | AAAGCAAACAGTGTGTACATATTCAA                    |
| <b>Trp53-Fwd</b>   | AGCTGACCGGCAGCAAAATTGGCCCAGCTTTCTTACTGCCT     |
| <b>Trp53-Rev</b>   | CATGCGAGAGACAGAGGCAA                          |
| <b>VEGFA-Fwd</b>   | AGCTGACCGGCAGCAAAATTGGTCGAGGAAGAGAGAGACGG     |
| <b>VEGFA-Rev</b>   | CGAGAACAGCCCAGAAGTTG                          |
| <b>AAVS1-Fwd</b>   | AGCTGACCGGCAGCAAAATTGCCTTACCTCTCTAGTCTGTGCTAG |
| <b>AAVS1-Rev</b>   | CGTAAGCAAACCTTAGAGGTTCTGG                     |
| <b>COSMC-Fwd</b>   | AGCTGACCGGCAGCAAAATTGAGGGAGGGATGATTTGGAAG     |
| <b>COSMC-Rev</b>   | TTGTCAGAACCATTGAGGAGGT                        |
| <b>POMGnT1-Fwd</b> | AGCTGACCGGCAGCAAAATTGTAGTTCGTGCTCTGTGAGGC     |
| <b>POMGnT1-Rev</b> | AATAGGAGCCAGTGGCAGTG                          |

|                  |                                                     |
|------------------|-----------------------------------------------------|
| <b>POMT1-Fwd</b> | <i>AGCTGACCGGCAGCAAAAATTGTTGGTTTCCTGTGTTTCACCTC</i> |
| <b>POMT1-Rev</b> | CCGGCATCAAATGTAGGTCT                                |
| <b>POMT2-Fwd</b> | <i>AGCTGACCGGCAGCAAAAATTCCTGGCAGAGTCCGAGCT</i>      |
| <b>POMT2-Rev</b> | GACAGCAGCGTCACCAAG                                  |
| <b>Bambi-Fwd</b> | <i>AGCTGACCGGCAGCAAAAATTGTTTCGCGATCGGGGATAGTTG</i>  |
| <b>Bambi-Rev</b> | CGATGGCTGTTCTTCTCACG                                |

The common extension of the IDAA-Fwd primers is indicated in italics. For species of the targeted genes, see Supplementary Table 3.

### Supplementary Table 3 | Nuclease target sites

| Target gene (nuclease)             | Target sequence (5' to 3')                                                |
|------------------------------------|---------------------------------------------------------------------------|
| <b><i>GALNT10</i></b> * (gRNA)     | ACTCTCTCAGCATCGGTCAT                                                      |
| <b><i>KRAS</i></b> * (gRNA)        | TAGTTGGAGCTGGTGGCGT                                                       |
| <b><i>B4GALT4</i></b> ⌘ (ZFN)      | GGCATCTACGTCATC <i>caccaGGTGAGCGTGGGGGCAGAC</i>                           |
| <b><i>GALNT3</i></b> * (QCgRNA #1) | CGTGTAGTTCTCAGCTATTC                                                      |
| <b><i>GALNT3</i></b> * (QCgRNA #2) | AGATCTATGGATGCAATATC                                                      |
| <b><i>GALNT3</i></b> * (QCgRNA #3) | TATGGAAGTAACCATAACCG                                                      |
| <b><i>GALNT3</i></b> * (QCgRNA #4) | ACTGGAGTCTTTCATTTGGC                                                      |
| <b><i>Trp53</i></b> § (gRNA)       | TGTACGGCGGTCTCTCCA                                                        |
| <b><i>VEGFA</i></b> * (gRNA)       | GACCCCTCCACCCCGCCTC                                                       |
| <b><i>AAVSI</i></b> * (ZFN)        | ACCCACAGTGG <i>ggccacTAGGGACAGGAT</i>                                     |
| <b><i>COSMC</i></b> ⌘ (TALEN)      | TGACTTATCACCCCAACCAGGT <i>AgtagaaggctgttGTTTCAGATATGGCTGTTACTT</i><br>TTA |
| <b><i>POMGnT1</i></b> * (gRNA)     | GAGGGACACATGGGCCTTCG                                                      |
| <b><i>POMT1</i></b> * (gRNA)       | ACCAGATAGTGTGGAGCTC                                                       |
| <b><i>POMT2</i></b> * (gRNA)       | CTTCGAGGCGGTCCGGCTGGT                                                     |
| <b><i>Bambi</i></b> † (gRNA)       | GGTTTCTCTGTGGTTTCAGC                                                      |

\*Homo sapiens; §Mus musculus; ⌘Cricetulus griseus; †Danio rerio. For TALEN and ZFN target sites, the nuclease-binding sequence is in uppercase.

## Supplementary Note | Peak Scanner<sup>TM</sup> 2 Software and GeneMarker<sup>®</sup> (Demo) Software.

**Peak Scanner<sup>TM</sup> 2 Software.** Thermo Fisher Scientific's free software for fragment analysis performs all the tasks needed for IDAA and is very easy to use (see **Supplementary Manual**). Peak Scanner works with data files from 310, 3100, 3130 and 3730, but not 3500 instruments. To obtain Peak Scanner<sup>TM</sup> 2, register at <http://resource.thermofisher.com/pages/WE28396/>, whereafter the software can be downloaded. Installation formally requires a computer with 32-bit operating system, a processor of at least 2.3 GHz and Windows 7.0. Peak Scanner does, however, work on some 64-bit computers. If not, download a "virtual machine application" such as VirtualBox from Oracle for PC or Mac (<https://www.virtualbox.org/>) or Parallels Desktop for Mac (<http://www.parallels.com>; licence available through IT in many institutes). A virtual machine is a software computer that allows users to run additional operating systems, such as the 32-bit version of Windows 7.0, and thereby applications for that operating system, such as Peak Scanner, on their desktops. After installing a virtual machine, request IT at your institute to install Windows 7.0 32-bit on your computer or purchase Windows 7.0 and select the 32-bit operating system during installation, then download and install Peak Scanner<sup>TM</sup> 2 as described above.

**GeneMarker<sup>®</sup> (Demo) Software.** A free trial version (access limited to 70 days) of Softgenetics' commercial software for fragment analysis. It is very easy to use, can be downloaded smoothly on most computers and uses data files from most fragment analyzers. The generated IDAA profiles, however, cannot be printed or saved. To obtain GeneMarker<sup>®</sup> (Demo), register at [http://www.softgenetics.com/gm\\_demo\\_form.php](http://www.softgenetics.com/gm_demo_form.php), where after the software can be downloaded.

## Supplementary Data | Sequences of pEPB104 and CAS9PBKS

### pEPB104, Addgene #68369

*Plasmid containing the U6 promoter, but no sgRNA or Cas9 elements. Can be used as template for the QCgRNA PCR as well as cloning vector for the resultant QCgRNA amplicon expression cassette.* The sequence of the U6 promoter (sequence ID gb|M14486|HUMUG6) and flanking EcoRI restriction endonuclease sites was synthesized by GeneArt (Thermo Fisher Scientific) and inserted into the EcoRV site of pMA-T, which is flanked 3' by a KpnI site. This allows excision of the U6 promoter by EcoRI/KpnI digestion and insertion of a QCgRNA amplicon expression cassette after its digestion with same enzymes. Below is shown the sequence of the U6 promoter in upper case and the flanking restriction endonuclease sites in lower case letters.

```
gatatcgaattcGAGGGCCTATTTCCCATGATTCCTTCATATTTGCATATACGATACAAGGCTGTTAGAGAGATAA
TTGGAATTAATTTGACTGTAAACACAAAGATATTAGTACAAAATACGTGACGTAGAAAGTAATAATTTCT
TGGGTAGTTTGCAGTTTTAAAATTATGTTTTAAAATGGACTATCATATGCTTACCGTAACTTGAAAGTATT
TCGATTTCTTGGCTTTATATATCTTGTGGAAAGGACGAAACACCGgaattcgatcgtacc
```

### CAS9PBKS, Addgene #68371

*Plasmid expressing Cas9-2A-EGFP under control of the CBh promoter.* The construct was generated by excising the CBh-Cas9-2A-EGFP-bGH\_PA\_terminator sequence from PX458<sup>2</sup> using KpnI/NotI restriction



endonucleases and insertion into the multiple cloning site of pBluescript KS (Stratagene) digested with same enzymes.

ATGGACTATAAGGACCACGACGGAGACTACAAGGATCATGATATTGATTACAAAGACGATGACGATAAGATGGCCCCAAAGAAGAA  
CGGAAAGGTCGGTATCCACGGAGTCCCAGCAGCCGACAAGAAGTACAGCATCGGCCCTGGACATCGGCACCAACTCTGTGGGCTGGG  
CGTGATCACCAGCAGTACAAGGTGCCAGCAAGAAATTCAGGTGCTGGGCAACACCCGACCGGCACAGCATCAAGAAGAACCTGA  
TCGGAGCCCTGTGTTTCGACAGCGGCGAAAACAGCCGAGGCCACCCGGCTGAAGAGAACCGCCAGAAGAAGATACACCAGACGGAAG  
AACCGGATCTGCTATCTGCAAGAGATCTTCAGCAACGAGATGGCCAAGGTGGACGACAGCTTCTCCACAGACTGGAAGAGTCTTCC  
TGGTGAAGAGGATAAGAAGCAGAGCGGCACCCCATCTTCGGCAACATCGTGGACGAGGTGGCCTACCACGAGAAGTACCCACCA  
TCTACCACCTGAGAAAAGAACTGGTGGACAGCACCACAAGGCCACTGCGGGTGTATCTATCTGGCCTGGCCACATGATCAAGT  
TCCGGGGCCACTTCTGATCGAGGGCGACCTGAACCCGACAACAGCGACGTGGACAAGCTGTTTATCCAGCTGGTGCAGACCTACA  
ACCAGCTGTTTCGAGGAAAACCCCATCAACGCCAGCGGCGTGGACGCCAAGGCCATCTGTCTGCCAGACTGAGCAAGAGCAGACGGC  
TGGAAAATCTGATCGCCAGCTGCCCGGAGAGAAGAATGGCCTGTTCCGAAACCTGATTGCCCTGAGCCTGGCCTGACCCCA  
ACTTCAAGAGCAACTTCGACCTGGCCGAGGATGCCAACTGCAGCTGAGCAAGGACACCTACGACGACCTGGACAACCTGTGG  
CCCAGATCGGCGACAGTACGCGACCTGTTTCTGGCCGCAAGAACCTGTCCGACCCATCCTGTGAGCGACATCCTGAGAGTGAA  
CACCGAGATCACCAGGCCCCCTGAGCGCTCTATGATCAAGAGATACGACGAGCACCACCAGGACCTGACCCTGTGAAAAGCTCT  
CGTGGCGCAGCAGCTGCTGAGAAGTACAAAAGATTTTCTTCGACCAGAGCAAGAACGGCTACGCCGGCTACATTGACGGCGGAGC  
CAGCCAGGAAGAGTTCTACAAGTTCATCAAGCCATCTGGAAAAGATGGACGGCACCGAGGAACTGCTCGTGAAGCTGAACAGAGA  
GGACCTGCTGCGGAAGCAGCGGACCTTCGACAACGGCAGCATCCCCACCAGATCCACCTGGGAGAGCTGCACGCCATCTGCGGCG  
GCAGGAAGATTTTTACCCATCTGAAAGGACAACCGGGAAAAGATCGAGAAGATCCTGACCTTCCGCATCCCCTACTACGTGGGCCCT  
CTGGCCAGGGGAAACAGCAGATTCCGCTGGATGACCAGAAAGAGCGAGGAAAACCATCACCCCTGGAACCTTCGAGGAAGTGGTGA  
CAAGGGCGCTTCCGCCAGAGCTTCATCGAGCGGATGACCAACTTCGATAAAGAACCTGCCAACGAGAAGGTGCTGCCAACGACAG  
CCTGCTGTACGAGTACTTCACCGTGTATAACGAGCTGACCAAAAGTGAAATACGTGACCGAGGGAATGAGAAAAGCCCGCCTTCTGAG  
CGGCGAGCAGAAAAGGCCATCGTGGACCTGCTGTTCAAGACCAACCGGAAAAGTACCGTGAAAGCAGCTGAAAGAGGACTACTTCA  
AGAAAATCGAGTGTCTCGACTCCGTGGAATCTCCGGCGTGAAGATCGGTTCAACGCCTCCCTGGGCACATACCACGATCTGTGAA  
AATTATCAAGGACAAGGACTTCTTGACAATGAGGAAAACGAGGACATTCTGGAAGATATCGTGTGACCCTGACACTGTTTGAGGA  
CAGAGAGATGATCGAGGAACGGCTGAAAACCTATGCCACCTGTTCGACGACAAAAGTATGAAGCAGCTGAAGCGGCGGAGATACA  
CCGGCTGGGGCAGGCTGAGCCGGAAGCTGATCAACGGCATCCGGGACAAGCAGTCCGGCAAGACAATCCTGGATTTCTGAAAGTCCG  
ACGGCTTCGCCAACAGAACTTCATGCAGCTGATCCACGACGACAGCCTGACCTTTAAAGAGGACATCCAGAAAGCCAGGTGTCCG  
GCCAGGGCGATAGCTGCACGACACATTGCCAATCTGGCCGCGACGCCCGCCATTAAGAAGGGCATCCTGCAGACAGTGAAGGTGG  
TGGACTGCTGTGAAAGTGATGGGCGGCACAAGCCGAGAACATCGTGATCGAAAATGGCCAGAGAGAACCAGACCACCCAGAAG  
GGACAGAAAGAACAGCCGCGAGAGAATGAAGCGGATCGAAGAGGCGATCAAGAGCTGGGCAGCCAGATCCTGAAAAGAACCCCCGT  
GGAAAACACCCAGCTGCAGAACGAGAAGCTGTACTGTACTACCTGCAGAAATGGGCGGGATATGTACGTGGACCAGGAACTGGACAT  
CAACCGGCTGTCCGACTACGATGTGGACCATATCGTGCCTCAGAGCTTCTGAAGGACGACTCCATCGACAACAAGGTGCTGACCAGA  
AGCGACAAGAACCAGGGGCAAGAGCGACAACGTGCCCTCCGAAGAGGTGCTGAAGAAGATGAAGAACTACTGGCGGCAGCTGTGAA  
CGCCAAGCTGATTACCCAGAGAAAGTTCGACAATCTGACCAAGGCCGAGAGAGGGCGCCTGAGCGAACTGGATAAGGCCGGCTTCAT  
CAAGAGACAGCTGGTGGAAAACCCGGCAGATCACAAGCAGTGGCACAGATCCTGGACTCCCGGATGAACACTAAGTACGACGAGA  
ATGACAAGCTGATCCGGGAAGTGAAGTGATCACCTGAAGTCAAGCTGGTGTCCGATTTCCGGAAGGATTTCCAGTTTTACAAAAGT  
GCGCGAGATCAACAACACTACCACCCAGCAGCCTACTGAACCGCTGTTGGAAACCGCCCTGATCAAAAAGTACCCTAAGCT  
GGAAAAGCGAGTTCTGTACGGCGACTACAAGGTGTACGACGTGCGGAAGATGATCGCCAAGAGCGAGCAGGAAAATCGGCAAGGCTA  
CCGCCAAGTACTTCTTCTACAGCAACATCATGAACTTTTTCAAGACCGAGATTACCCTGGCCAACGGCGAGATCCGGAAGCGGCCTCT  
GATCGAGACAACCGCGAAAACCGGGGAGATCGTGTGGGATAAGGGCCGGGATTTTGCCACCGTGCAGGAAAGTGTGAGCATGCCCC  
AAGTGAATATCGTGAAGAACCGAGGTGCAGACAGGCGGCTTCAGCAAAGAGTCTATCTGCCCAAGAGGAACAGCGATAAGCTG  
ATCGCCAGAAAAGGACTGGGACCCTAAGAAGTACGGCGGCTTCGACAGCCCCACCGTGGCCTATTCTGTGCTGGTGGTGGCCAAA  
GTGAAAAGGGCAAGTCCAAGAAAAGTGAAGAGTGTGAAAAGAGCTGCTGGGGATCACCATCATGAAAAGAAAGCAGCTTCGAGAAAGAA  
TCCCATCGACTTTCTGGAAGCCAAGGGCTACAAGAAGTGAAGAAAGGACCTGATCATCAAGCTGCCCTAAGTACTCCCTGTTTCGAGCTG  
GAAAACGGCCGGAAGAGAATGCTGGCCTCTGCCGGCAACTGCAGAAAGGAAACGAACTGGCCCTGCCCTCCAAATATGTGAACCTC  
CTGTACTGGCCAGCCACTATGAGAAGCTGAAGGGCTCCCCGAGGATAATGAGCAGAAAACAGCTGTTTGTGGAACAGCACAAGCAC  
TACCTGGACGAGATCATCGAGCAGATCAGCGAGTTCCTCAAGAGAGTGATCCTGGCCGACGCTAATCTGGACAAAAGTGTGTCCGCT  
ACAACAAGCACCAGGATAAGCCCATCAGAGAGCAGGCCGAGAATATCATCCACCTGTTTACCCTGACCAATCTGGGAGCCCTGCCG  
CCTTCAAGTACTTTGACACCACCATCGACCGAAGAGGTACACCAGCACCAAGAGGTGCTGGACGCCACCTGATCCACCAGAGCA  
TCACCGGCTGTACGAGACACGGATCGACCTGTCTAGCTGGGAGGGCGACAAAAGGCCGGCGGCCACGAAAAGGCCGGCCAGGCA  
AAAAAGAAAAGGAATTCGGCAGTGGAGAGGGCAGAGGAAGTCTGCTAACATGCGGTGACGTGAGGAGAATCCTGGCCAGTGAG  
CAAGGGCGAGGAGCTGTTACCGGGGTGGTGCCATCTGGTTCGAGCTGGACGGCGACGTAACCGCCACAAGTTCAGCGTGTCCGG  
CGAGGGCCAGGGCGATGCCACTACGGCAAGCTGACCTGAAGTTCATCTGCACCACCGGCAAGCTGCCCTGCCCTGGCCACCT  
CGTGACCTGACCTGACCTACGGCGTGCAGTGTCTACGCCATACCCGACCATGAAGCAGCAGCAGTCTTCAAGTCCGCCATGGCC  
GAAGGCTACGTCCAGGAGCGCACCATCTTCTTCAAGGACGACGGCAACTACAAGACCCGCGCCGAGGTGAAGTTCGAGGGCGACACC  
CTGGTGAACCGCATCGAGCTGAAGGGCATCGACTTCAAGGAGGACGGCAACATCTGGGGCACAAGCTGGAGTACAACACTACAACAGC  
CACAACGTCTATATCATGGCCGACAAGCAGAAGAACGGCATCAAGGTGAACCTCAAGATCCGCCACAACATCGAGGACGGCAGCGTG  
CAGCTCGCCGACCACTACCAGCAGAACACCCCATCGGCGACGGCCCGTGTGTGCTGCCGACACCACTACCTGAGCACCCAGTCC  
GCCCTGAGCAAAGACCCCAACGAGAAGCGCGATCATATGGTCTGTGAGGTTCTGTGACCGCCCGGGATCACTCTCGGCATGGAC  
GAGCTGTACAAGGAATTCTAA

## Supplementary References

1. Kabadi, A.M., Ousterout, D.G., Hilton, I.B. & Gersbach, C.A. Multiplex CRISPR/Cas9-based genome engineering from a single lentiviral vector. *Nucleic Acids Research* **42**, e147 (2014).
2. Ran, F.A. et al. Genome engineering using the CRISPR-Cas9 system. *Nat. Protocols* **8**, 2281-2308 (2013).
3. Heckl, D. et al. Generation of mouse models of myeloid malignancy with combinatorial genetic lesions using CRISPR-Cas9 genome editing. *Nat Biotech* **32**, 941-946 (2014).
4. Chu, V.T. et al. Increasing the efficiency of homology-directed repair for CRISPR-Cas9-induced precise gene editing in mammalian cells. *Nat Biotech* **33**, 543-548 (2015).
5. Chen, S. et al. Genome-wide CRISPR Screen in a Mouse Model of Tumor Growth and Metastasis. *Cell* **160**, 1246-1260 (2015).
6. Ding, Q. et al. Enhanced efficiency of human pluripotent stem cell genome editing through replacing TALENs with CRISPRs. *Cell stem cell* **12**, 393-394 (2013).
7. Swiech, L. et al. In vivo interrogation of gene function in the mammalian brain using CRISPR-Cas9. *Nat Biotech* **33**, 102-106 (2015).
8. Farzadfard, F., Perli, S.D. & Lu, T.K. Tunable and Multifunctional Eukaryotic Transcription Factors Based on CRISPR/Cas. *ACS Synthetic Biology* **2**, 604-613 (2013).
9. Koike-Yusa, H., Li, Y., Tan, E.P., Velasco-Herrera, M.D.C. & Yusa, K. Genome-wide recessive genetic screening in mammalian cells with a lentiviral CRISPR-guide RNA library. *Nat Biotech* **32**, 267-273 (2014).
10. Feng, Y., Zhang, S. & Huang, X. A robust TALENs system for highly efficient mammalian genome editing. *Scientific Reports* **4**, 3632 (2014).
11. Ding, Q. et al. A TALEN Genome-Editing System for Generating Human Stem Cell-Based Disease Models. *Cell Stem Cell* **12**, 238-251 (2013).

# Supplementary Manual

## Peak Scanner™ 2 Software step-by-step guide (page 1/3)

© Thermo Fisher Scientific Inc. Used under permission

This quick-guide shows the few, essential steps needed from import of data files from ABI Genetic Analyzers 310, 3100, 3130 or 3730 instruments to determination of amplicon abundance and size. Peak Scanner offers several additional analysis tools than shown here, but these are not essential for determining the indel pattern of an edited sample.

### 1. Open Peak Scanner™ 2.

Upon opening Peak Scanner, this screen image will appear. Click “Start New Project” button (a).

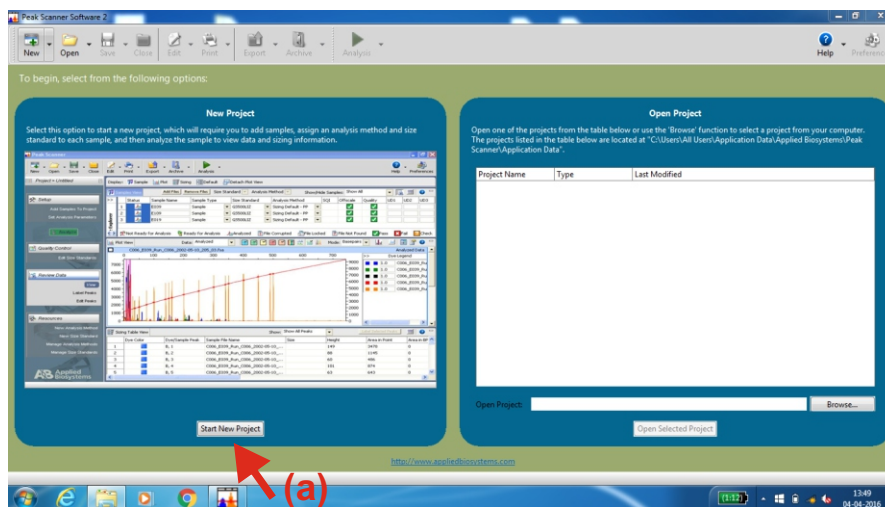

### 2. Import sample files.

Click the “Add Files” button (b) in the window that has opened.

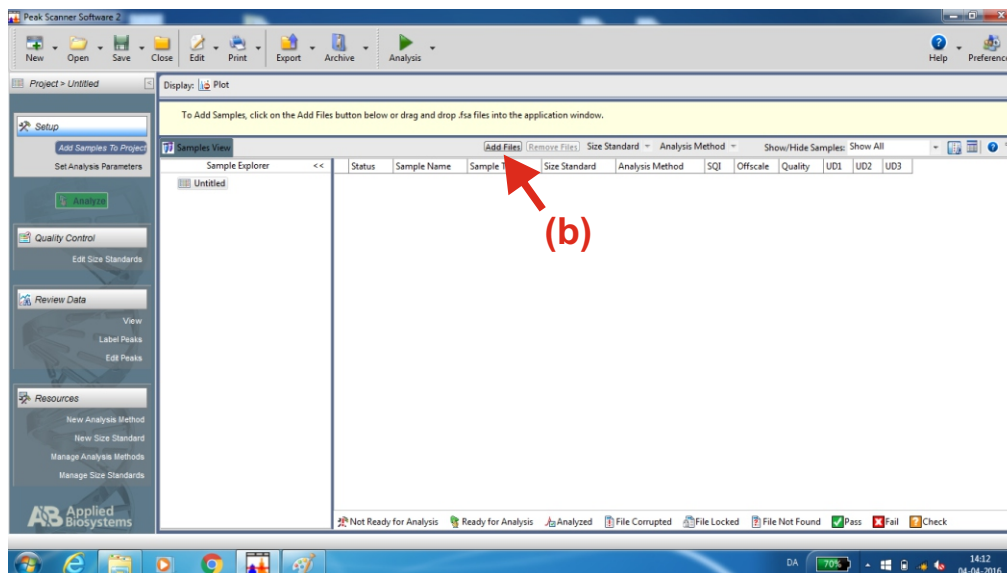

In the next window that opens, go to the folder where you have your “.fsa” data files from the ABI Genetic Analyzer. Click on the file to be analyzed (if more than one, press the shift key and click on several .fsa files). The clicked files will be highlighted like the “POMT1.fsa” file in this example.

Then, click “Add Selected Files>>” button (c) and finally the “OK” button (d).

(Alternatively, the .fsa files may be dragged-and-dropped into the window)

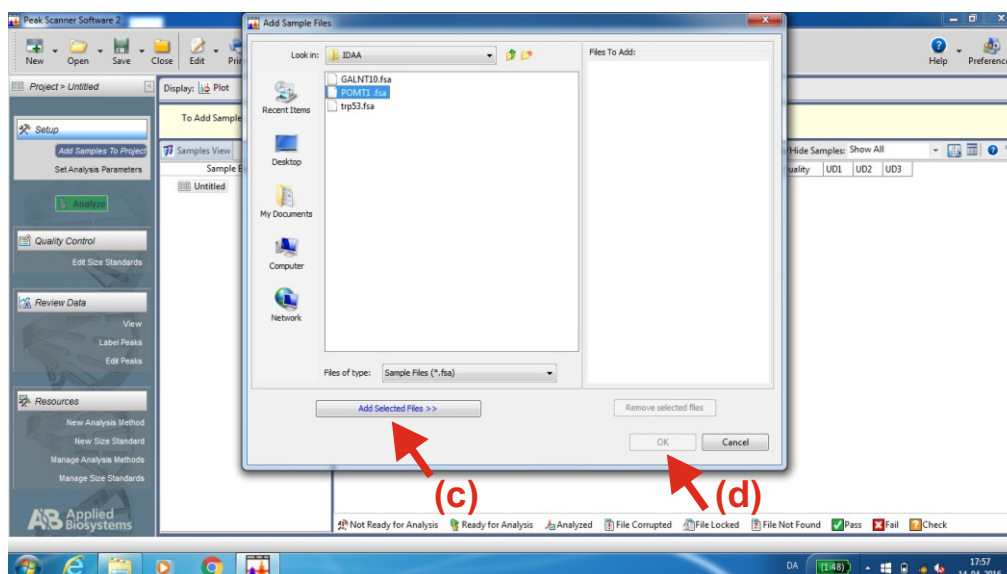

## Peak Scanner™ 2 step-by-step guide (page 2/3)

### 3. Select size standard and analysis method.

First, click the “Size Standard” button (e), and from the pull-down menu click the size standard used (for IDAA, typically GS500LIZ).

Next, click the “Analysis Method” button (f), and select “Sizing Default - PP” if the IDAA primers were present in the analyzed samples (the typical scenario, since IDAA capillary electrophoresis is normally performed on crude PCRs). Otherwise, select “Sizing Default - NPP” if IDAA amplicons were purified prior to capillary electrophoresis.

Finally, click the “Analyze” button (g).

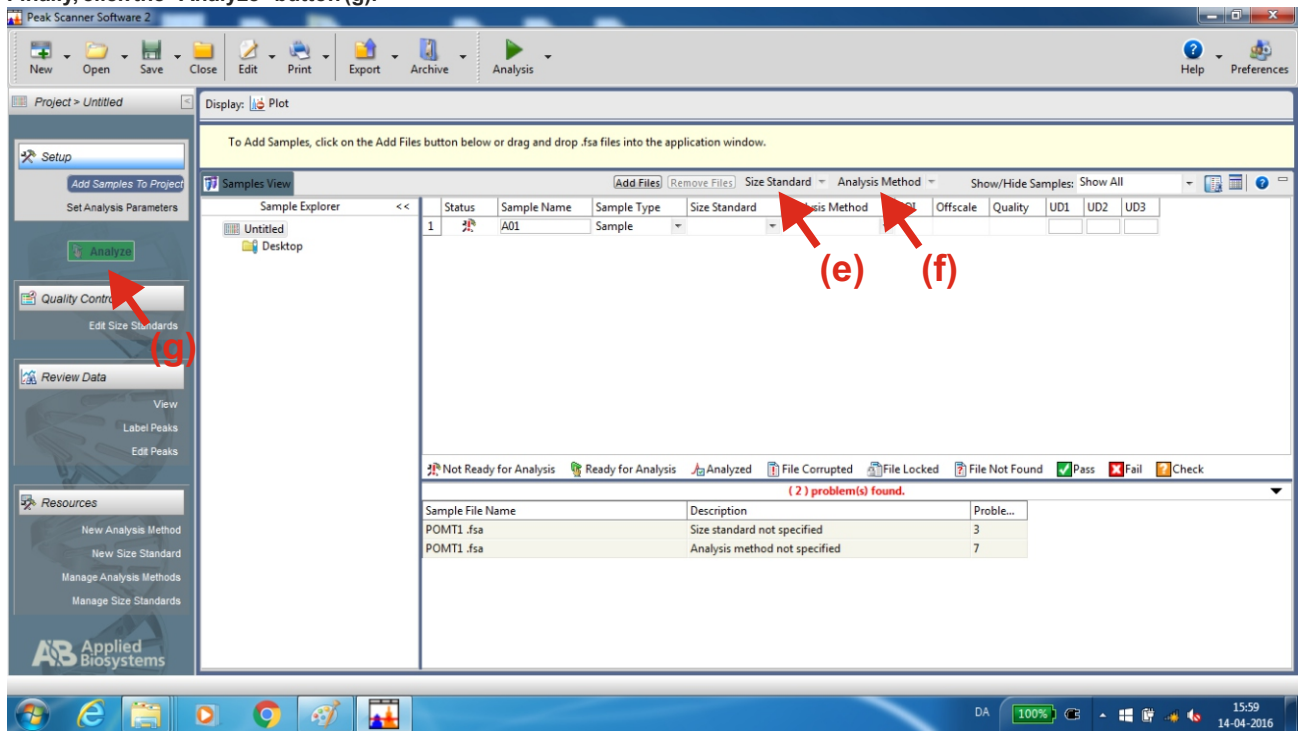

### 4. Zoom in on the amplicon peaks.

The window that now opens shows the IDAA profile as a blue trace with peaks for all the different amplicons present in the sample as well as a FamFwd primer peak around 20 nt (h). Size standard peaks are orange.

To zoom in on peaks, place the cursor over the top x-axis for a magnifying glass symbol to appear as the cursor. Click and drag to zoom in on peaks in the box that is being drawn upon dragging.

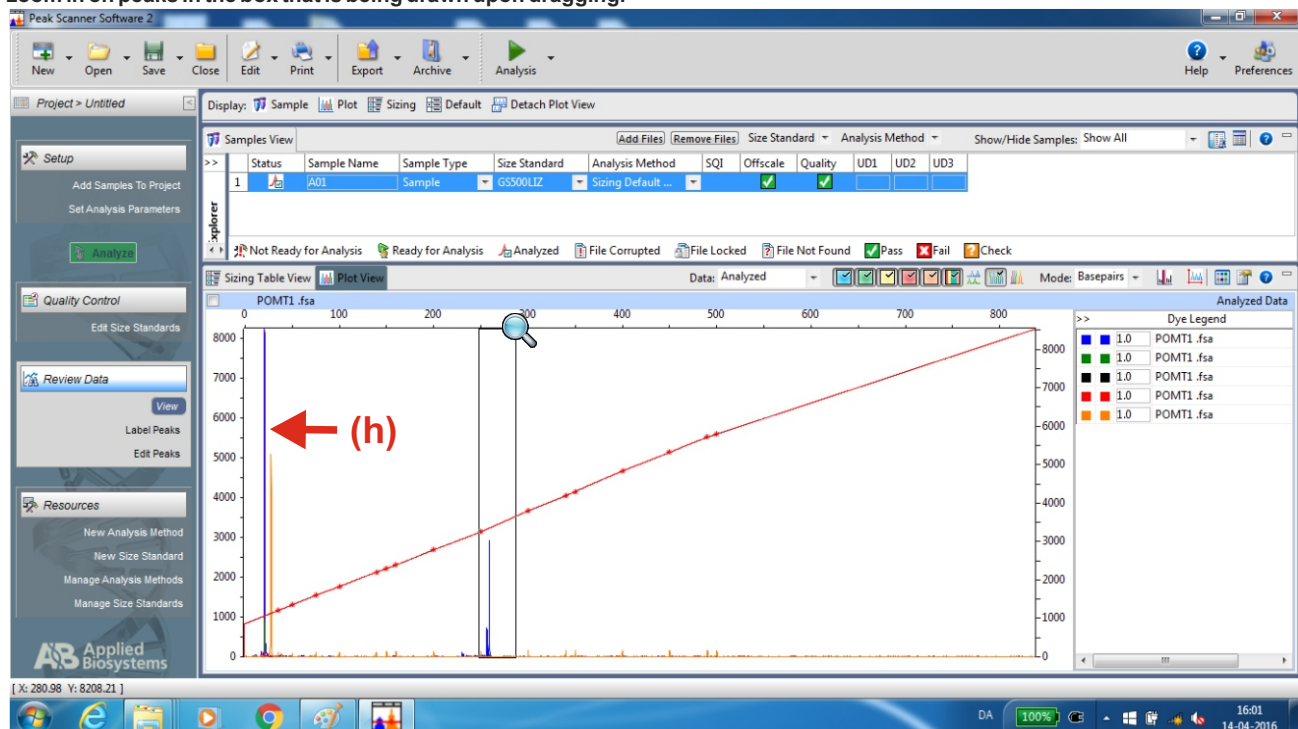

# Peak Scanner™ 2 step-by-step guide (page 3/3)

## 5. Analyze high-abundance peaks.

Click on a peak and in the box that opens (i), view peak height (H), peak area (A) and amplicon size (S). In below example, two peaks were clicked.

To zoom in on low-abundance peaks, place the cursor on the y-axis for a magnifying glass to appear. Click and box to zoom in.

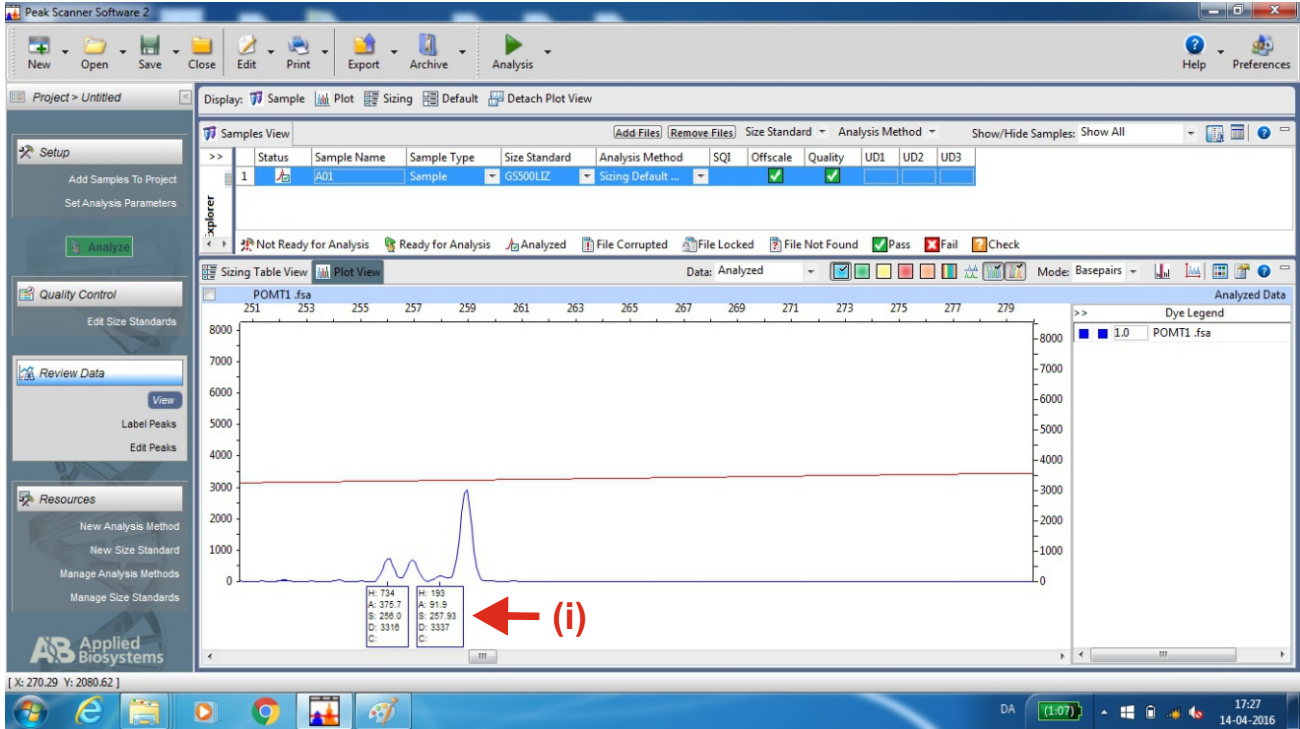

## 6. Analyze low-abundance peaks.

Click on peaks to analyze as described in step 5. The determined sizes of the high-lighted amplicons are 252.12 (i.e. 252), 256.0 and 257.93 (i.e. 258) bp. Thus, amplicon sizes are determined with small deviations from the actual size.

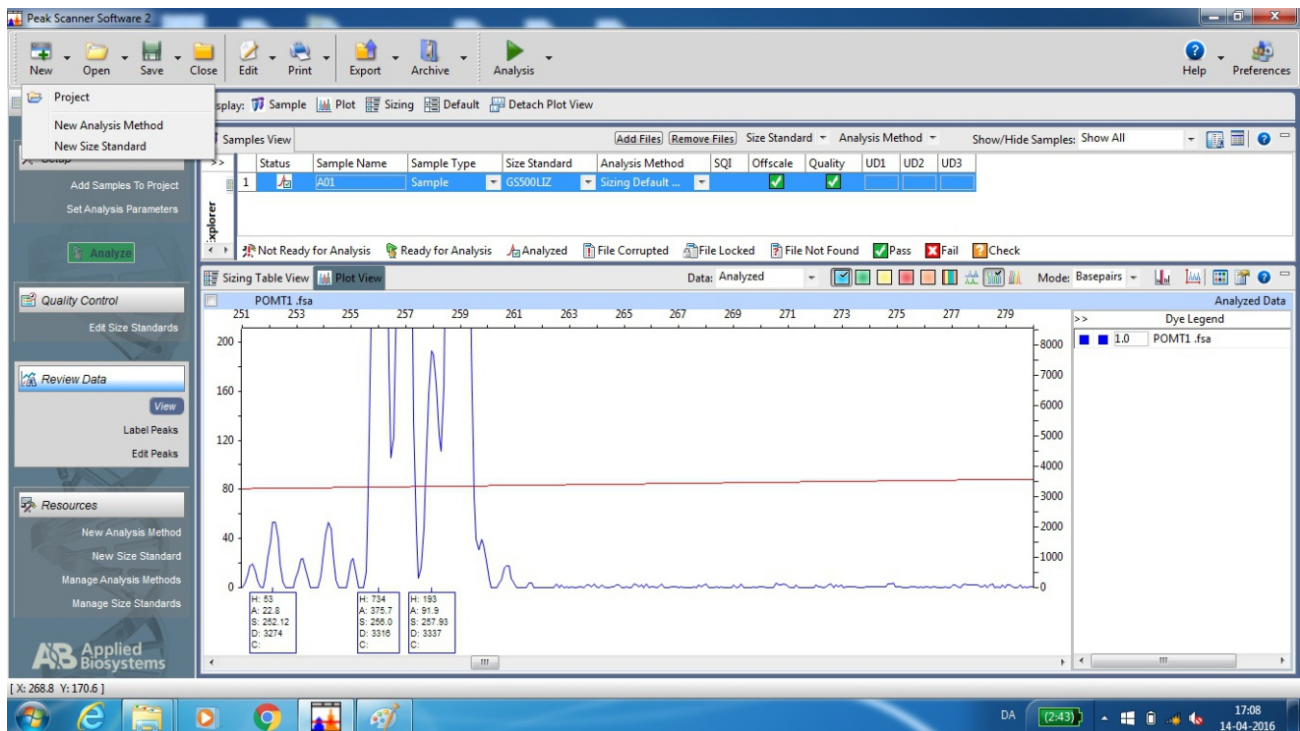

Supplement: NIHMS1579116-supplement-Supplementary_Information.pdf [file NIHMS1579116-supplement-Supplementary_Information.pdf]
